# Supplementary material
Source: Research Square preprint supplement (doi:10.21203/rs.3.rs-8829806/v1)
Supplement: Supplementary file 1 [file 5ea240f989e499aced93045a.docx]

**“Supplementary tables”**

| **Supplementary Table 1: Biochemical and hematological indices in MNT and NA groups during the study** | | | | |
| --- | --- | --- | --- | --- |
|  | | **Group** | |  |  |
| **Value** | **Time** | **MNT**  **(Mean ± SD)** | **NA**  **(Mean ± SD)** | ***p*** |
| CRP (mg/dL) | 0 | 15.38 ± 19.65 | 14.85 ± 18.93 | 0.510 |
| 1 | 16.29 ± 20.69 | 15.14 ± 13.33 | 0.758 |
| 2 | 14.70 ± 18.33 | 8.13 ± 5.99 | 0.094 |
| Hemoglobin (g/dL) | 0 | 12.85 ± 1.98 | 12.54 ± 1.77 | 0.419 |
| 1 | 11.63 ± 1.78 | 11.42 ± 1.47 | 0.539 |
| 2 | 11.16 ± 1.27 | 11.22 ± 1.48 | 0.859 |
| WBC (cells/mm³) | 0 | 7,895.83 ± 3,071.20 | 7,890.19 ± 4,210.47 | 0.646 |
| 1 | 4,039.13 ± 3,031.35 | 4,088.88 ± 2,701.95 | 0.905 |
| 2 | 6,056.09 ± 2,642.25 | 4,894.59 ± 1,552.40 | 0.073 |
| Albumin (g/dL) | 0 | 3.85 ± 0.28 | 3.98 ± 0.39 | 0..056 |
| 1 | 3.75 ± 0.31 | 3.67 ± 0.40 | 0.326 |
| 2 | 3.70 ± 0.40 | 3.84 ± 0.49 | 0.159 |
| Total Protein (g/dL) | 0 | 7.23 ± 0.38 | 7.09 ± 0.54 | 0.072 |
| 1 | 6.71 ± 0.60 | 6.72 ± 0.58 | 0.918 |
| 2 | 6.78 ± 0.61 | 6.86 ± 0.60 | 0.569 |
| TLC (cells/mm³) | 0 | 2,038.77 ± 830.28 | 1,816.98 ± 724.17 | 0.159 |
| 1 | 735.14 ± 438.12 | 708.42 ± 448.32 | 0.532 |
| 2 | 1,608.83 ± 654.61 | 1,567.10 ± 721.28 | 0.512 |
| RDW (%) | 0 | 13.82 ± 2.54 | 13.51 ± 1.83 | 0.964 |
| 1 | 16.05 ± 2.74 | 15.86 ± 2.92 | 0.510 |
| 2 | 16.50 ± 2.07 | 16.73 ± 2.97 | 0.694 |
| Cholesterol (mg/dL) | 0 | 180.97 ± 38.47 | 189.01 ± 40.86 | 0.317 |
| 1 | 189.20 ± 49.85 | 188.00 ± 44.21 | 0.904 |
| 2 | 189.97 ± 45.25 | 187.54 ± 46.58 | 0.817 |
| Triglycerides (mg/dL) | 0 | 106.04 ± 48.76 | 100.54 ± 30.51 | 0.844 |
| 1 | 116.34 ± 53.06 | 115.55 ± 41.36 | 0.873 |
| 2 | 116.25 ± 48.79 | 115.37 ± 35.80 | 0.850 |
| LDL (mg/dL) | 0 | 107.83 ± 28.11 | 106.88 ± 31.09 | 0.873 |
| 1 | 115.72 ± 30.96 | 110.26 ± 31.78 | 0.414 |
| 2 | 107.75 ± 31.04 | 109.51 ± 30.44 | 0.802 |
| HDL (mg/dL) | 0 | 38.26 ± 6.48 | 39.09 ± 5.02 | 0.295 |
| 1 | 38.50 ± 5.71 | 38.80 ± 5.94 | 0.466 |
| 2 | 38.62 ± 7.60 | 40.72 ± 7.73 | 0.214 |
| Measurements were taken at three time points: 0 (baseline), 1 (post-intervention), and 2 (4-6 weeks follow-up). Statistical significance was set at p < 0.05. Non-significant values are presented in plain (unbolded) text. Abbreviations: MNT, Medical Nutrition Therapy (intervention group); NA, Nutrition Advice (control group); CRP, C-reactive protein; WBC, White Blood Cell Count; TLC, Total Lymphocyte Count; RDW, Red Cell Distribution Width; LDL, Low-Density Lipoprotein; HDL, High-Density Lipoprotein. | | | | |
